# Supplementary material for: The kinetics and mechanism of photooxygenation of 4′-diethylamino-3-hydroxyflavone
Source: Royal Society of Chemistry journal article supplement (doi:10.1039/c5pp00358j), 2015-12-18
Supplement: c5pp00358j1.pdf [file c5pp00358j1.pdf]

## Kinetics and mechanism of photooxygenation of 4'-diethylamino-3-hydroxyflavone

Zoltán Szakács,<sup>a</sup> Márton Bojtár,<sup>b</sup> László Drahos,<sup>c</sup> Dóra Hessz,<sup>d</sup> Mihály Kállay,<sup>e</sup>  
Tamás Vidóczy,<sup>d</sup> István Bitter,<sup>b</sup> Miklós Kubinyi<sup>a,d</sup>

<sup>a</sup> Department of Physical Chemistry and Materials Science, Budapest University of Technology and Economics, 1521 Budapest, Hungary

<sup>b</sup> Department of Organic Chemistry and Technology, Budapest University of Technology and Economics, 1521 Budapest, Hungary

<sup>c</sup> Institute of Organic Chemistry, Research Center for Natural Sciences, Hungarian Academy of Sciences, 1519 Budapest, P.O. Box 286., Hungary

<sup>d</sup> Institute of Materials and Environmental Chemistry, Research Center for Natural Sciences, Hungarian Academy of Sciences, 1519 Budapest, P.O. Box 286., Hungary

<sup>e</sup> MTA-BME Lendület Quantum Chemistry Research Group, Department of Physical Chemistry and Material Science, Budapest University of Technology and Economics, 1521 Budapest, Hungary

### Electronic Supporting Information (ESI)

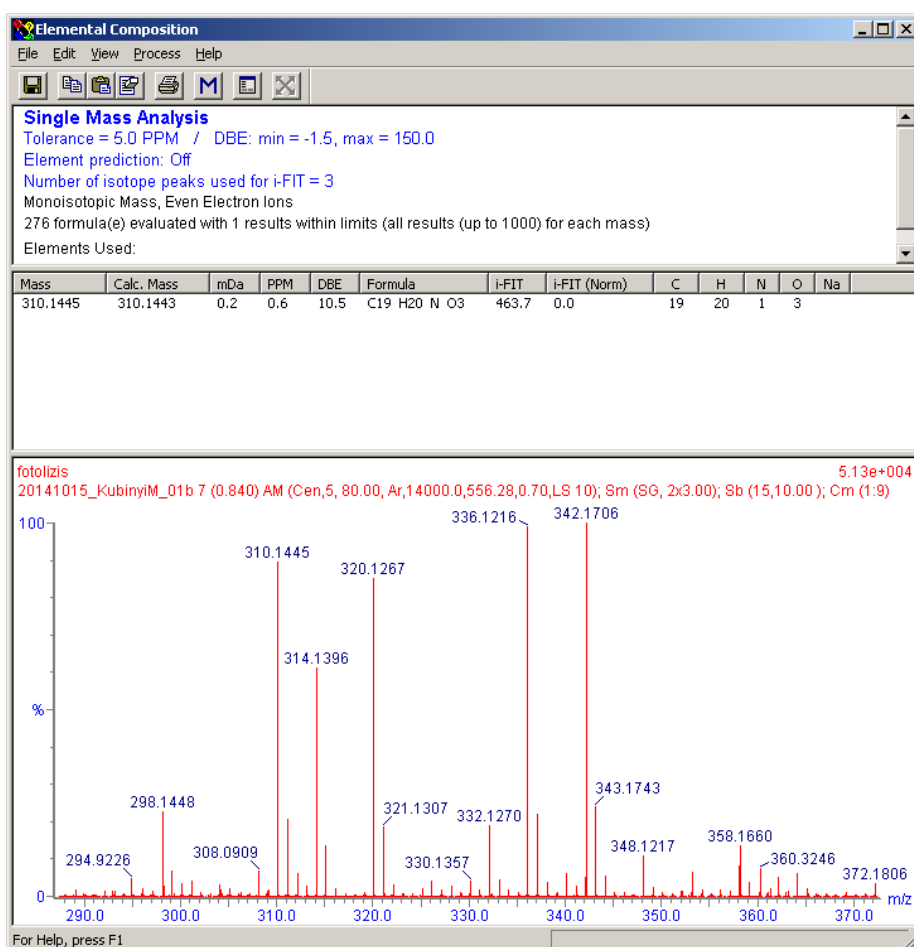

Fig. S1. High resolution positive electrospray mass spectrum of photolysis reaction mixture. 310.1445 - [D+H]<sup>+</sup>, 332.1270 - [D+Na]<sup>+</sup>, 314.1396 - [P+H]<sup>+</sup>, 336.1216 - [P+Na]<sup>+</sup>.

Table S1. Stability constants of alkaline earth metal complexes of 4'-diethylamino-3-hydroxyflavone (D).

| Complex    | $K_S / M^{-1} /$ |
|------------|------------------|
| $MgD^{2+}$ | 110              |
| $CaD^{2+}$ | 17               |
| $SrD^{2+}$ | 5,6              |
| $BaD^{2+}$ | 11               |

Table S2. Theoretically calculated Gibbs free energies /Hartree/.

| Species          | $S_0$        | $S_1$        | $T_1$        |
|------------------|--------------|--------------|--------------|
| D                | -1015.237726 | -1015.13004  |              |
| T                | -1015.217948 | -1015.13637  | -1015.175567 |
| T-O <sub>2</sub> | -1165.511091 | -1165.505880 |              |
| TS1              | -1165.429035 |              |              |
| TS2              | -1165.480667 | -1165.501203 |              |
| P                | -1052.382106 | -1052.241846 |              |
| O <sub>2</sub>   |              |              | -150.279963  |
| CO               | -113.291676  |              |              |
| TS(rearr.)       | -1015.050586 |              |              |

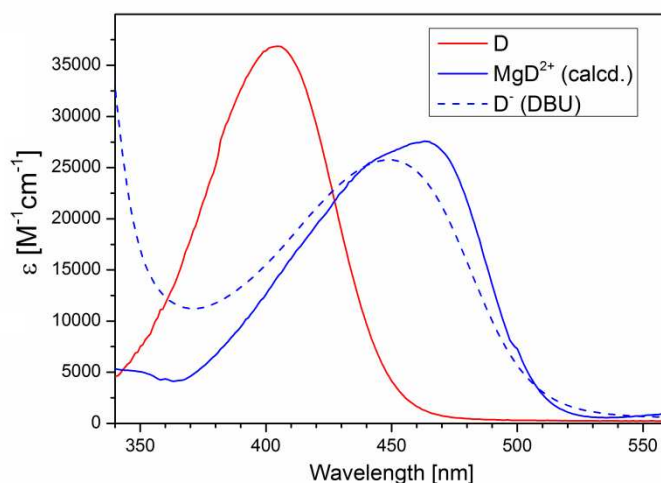

Fig. S2. Absorption spectra of the neutral 4'-diethylamino-3-hydroxyflavone (D), its anionic form ( $D^-$ ) and Mg complex ( $MgD^{2+}$ ) in acetonitrile solution. The spectrum of  $D^-$  measured in presence of 3M DBU. The spectrum  $MgD^{2+}$  was calculated by least square fitting from the spectra in Fig. 1a in the paper.
